# Supplementary material for: Polyacrylonitrile-Derived Carbon Nanocoating for Long-Life High-Power Phosphate Electrodes
Source: MDPI journal article supplement (doi:10.3390/applnano4010002), 2023-02-01
Supplement: s1 [file s1]

Archive with 1 entries (1 files):
- applnano-2142520-supplementary.pdf
