# Supplementary material for: Polyacrylonitrile-Derived Carbon Nanocoating for Long-Life High-Power Phosphate Electrodes
Source: MDPI journal article supplement (doi:10.3390/applnano4010002), 2023-02-01
Supplement: s1 [file s1 › applnano-2142520-supplementary.pdf]

## Supplementary Materials: Polyacrylonitrile-Derived Carbon Nanocoating for Long-Life High-Power Phosphate Electrodes

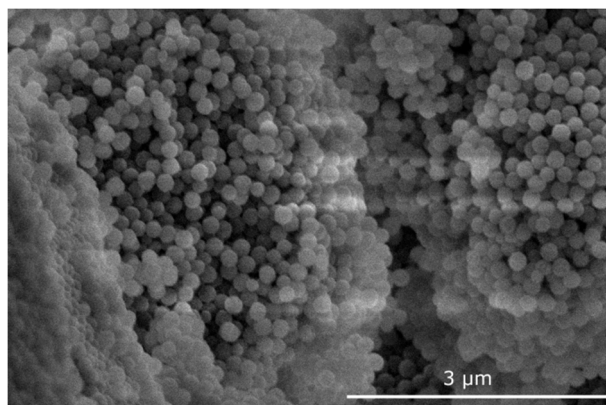

**Figure S1.** SEM image of PAN particles.

**Table S1.** Mass ratio for producing Li-rich LFMP/C composites.

| Sample ID | Mass of Li-rich LFMP, g | Mass of Precursor, mg | Expected Carbon Content, % |
|-----------|-------------------------|-----------------------|----------------------------|
| PAN-2     | 1                       | 30.0                  | 2                          |
| PAN-4     |                         | 61.3                  | 4                          |
| PAN-8     |                         | 127.8                 | 8                          |
| Glu       |                         | 104.2                 | 4                          |

The carbon content was estimated by the following equation:  $M = \frac{1+x}{1-y}$  where M – is the total mass change of the bare sample, which includes oxidation of the LFMP on air at 900°C, x – carbon content, y – total mass change of LFMP/C composites resulting from LFMP oxidation and carbon burning at 900°C. The experimental TG curves uncoated LFMP is depicted in Figure S2. The overlapping of d-metals and carbon oxidation makes it impossible to precisely extract the correct values of carbon content. In that sense it is necessary for d-metals oxidation process to be complete which could be deduced by the appearance of plateau at TG curves.

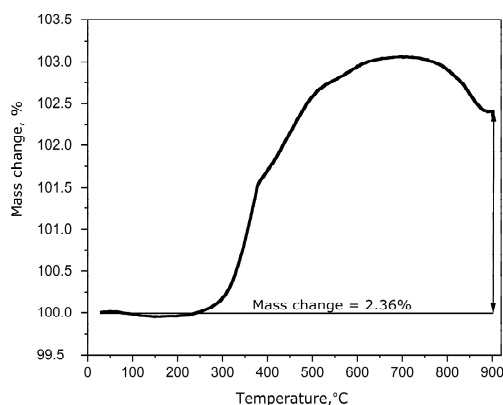

**Figure S2.** Experimental TG curve for pristine Li-rich LFMP.

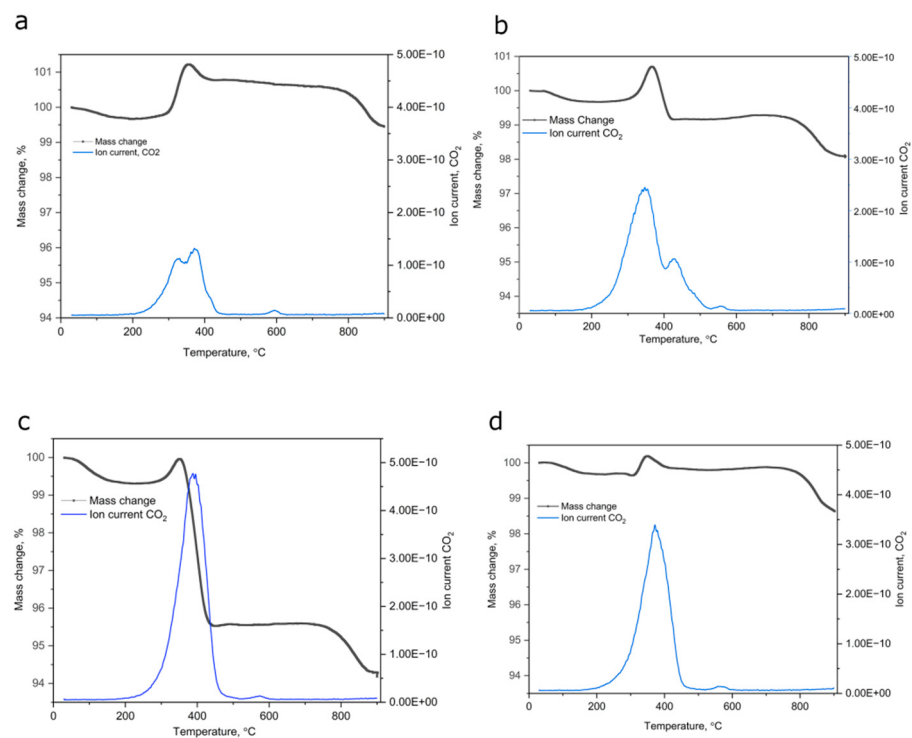

**Figure S3.** Experimental TG curve for PAN-2 (a), PAN-4 (b), PAN-8 (c) and Glu (d).

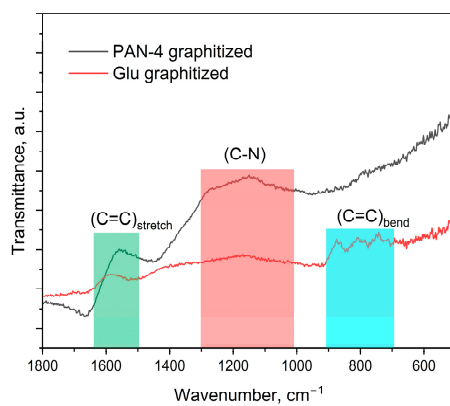

**Figure S4.** Organic functional groups presenting in graphitized PAN and Glu after 650  $^{\circ}\text{C}$ .

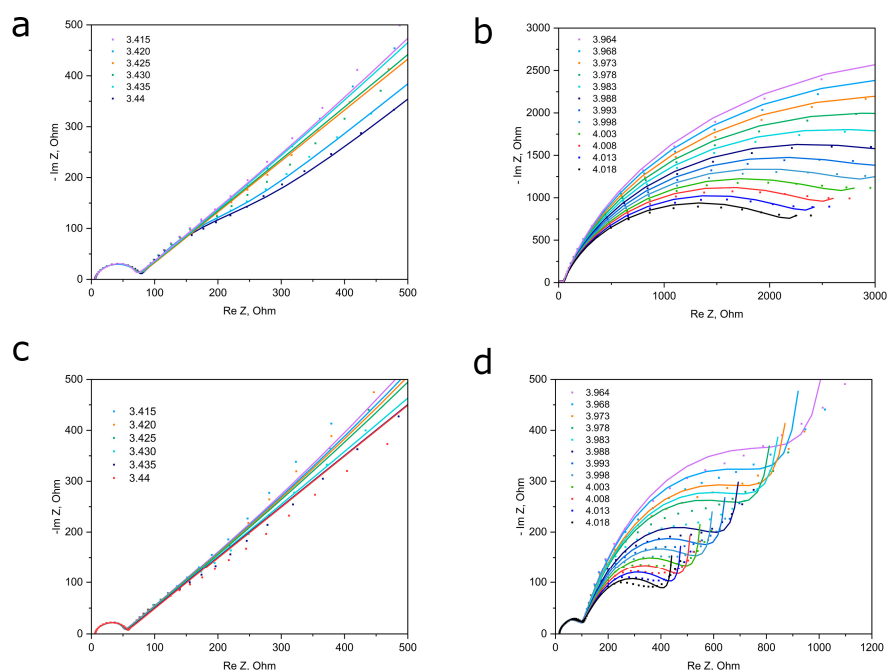

**Figure S5.** Impedance spectra of LFMP/C in the single-phase regions of Fe redox for Glu (a) and PAN-4 (b) and Mn redox for Glu (c) and PAN-4 (d). Symbols are experimental data, lines represent the fitted impedance spectra.

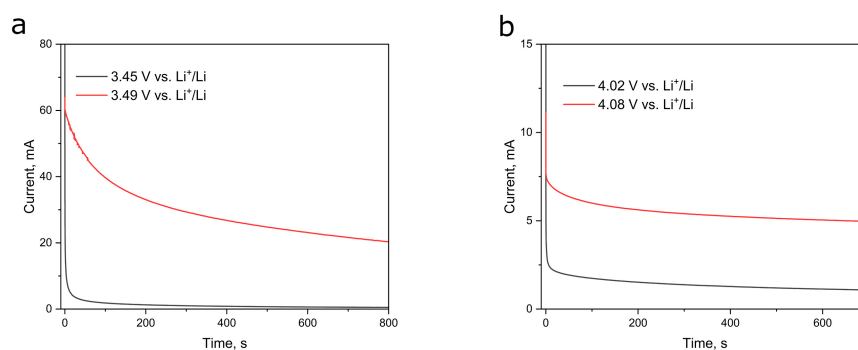

**Figure S6.** Current transients of PAN-4 sample assigned to the diffusion and two-phase transients before and after the phase transition of Fe (a) and Mn (b).

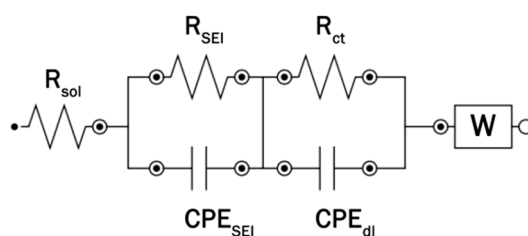

**Figure S7.** Equivalent circuit model for impedance data treatment, where  $R_{\text{sol}}$  represents the resistivity of electrolyte,  $R_{\text{SEI}}$  and  $\text{CPE}_{\text{SEI}}$  are resistivity and capacitance of SEI layer,  $R_{\text{ct}}$  and  $\text{CPE}_{\text{dl}}$  – charge transfer resistance and double layer capacitance,  $W$  – Warburg element.
